# Supplementary material for: Non-destructive Inhibition of Metallofullerenol Gd@C82(OH)22 on WW domain: Implication on Signal Transduction Pathway
Source: PubMed Central journal article supplement — Sci Rep. 2012 Dec 11;2:957. doi: 10.1038/srep00957 (PMC3518810; doi:10.1038/srep00957), 2012-12-11
Supplement: srep00957-s1.pdf [file srep00957-s1.pdf]

## Supporting Information

### **Non-destructive Inhibition of Metallofullerenol Gd@C<sub>82</sub>(OH)<sub>22</sub> on WW domain: Implication on Signal Transduction Pathway**

*Seung-gu Kang<sup>1</sup>, Tien Huynh<sup>1</sup>, and Ruhong Zhou<sup>1,2</sup> \**

<sup>1</sup> Computational Biology Center, IBM Thomas J. Watson Research Center  
Yorktown Heights, NY 10598 (USA)

<sup>2</sup> Department of Chemistry, Columbia University,  
New York, NY 10027 (USA)

\* Corresponding author: [ruhongz@us.ibm.com](mailto:ruhongz@us.ibm.com)

**Figure S1.** **a)** Root-mean square deviation (rmsd) and **b)** root-mean square fluctuation (rmsf) of the WW domain in the binary system with four Gd@C<sub>82</sub>(OH)<sub>22</sub> molecules. **c)** rmsd and **d)** rmsf of the WW domain when with both Gd@C<sub>82</sub>(OH)<sub>22</sub> and the PRM.

**Figure S2.** **a)** The residue types of WW domain. Colors represent residue type depending on polarity: blue for positively charged, red for negatively charged, green for polar, white for non-polar and yellow for key binding site residues. **b)** Electrostatic potential around the WW domain with blue for positive and red for negative fields calculated by APBS tool.<sup>1</sup> T1 and T2 indicate the first and second turn of the WW domain, respectively. The two PRM binding grooves are indicated with arrows, to which Gd@C<sub>82</sub>(OH)<sub>22</sub> also binds. The first two Pro's of the PPxY motif are packed into the groove-1, and the Tyr of the PPxY is accommodated by the groove-2.

**Figure S3.** Binding free energy landscape between the full sequence of WW domain (46 residues) with Gd@C<sub>82</sub>(OH)<sub>22</sub> (a), and PRM (b). The total number of atoms in the ternary system is ~20,000. The solvated system was also run 5 times, with simulation length about 150ns each. All the other simulation details are the same as the truncated system with the functional unit (L13-P42) only. Similarly, **D** and **S** of two axes in the free energy diagrams indicate distance and contact area. The subscripts P, K, L and M represent protein, key residues, PRM ligand and Gd@C<sub>82</sub>(OH)<sub>22</sub>, respectively. The local energy minima are indicated with free energy numbers. With the full sequence of WW domain, Gd@C<sub>82</sub>(OH)<sub>22</sub> again wins the competition over the native ligand PRM in its binding with the WW domain, with  $\Delta\Delta G \approx -0.53$  kcal/mol, despite the more flexible terminal residues (which affect the shapes and details of the free energy landscapes somewhat). These findings are consistent with the results from the functional unit (L13-P42) only, indicating Gd@C<sub>82</sub>(OH)<sub>22</sub> can potentially inhibit the WW domain function.

**Figure S1.**

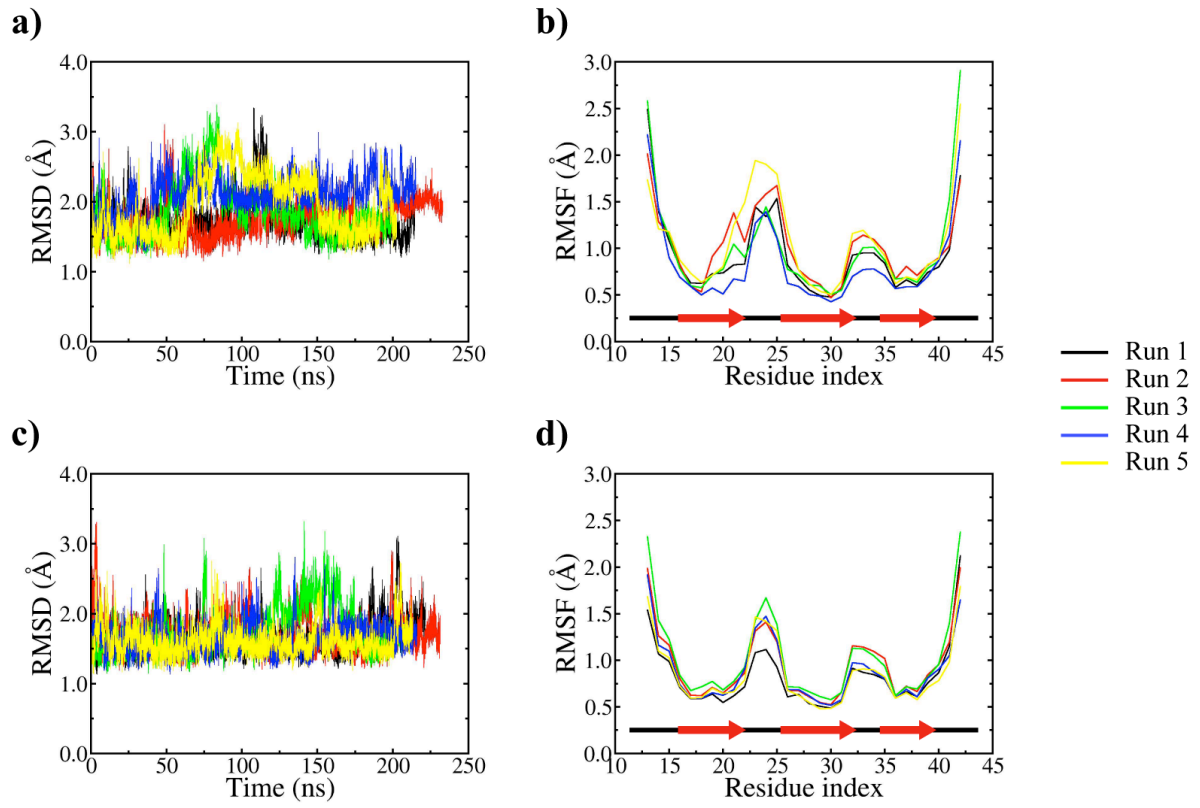

Figure S2.

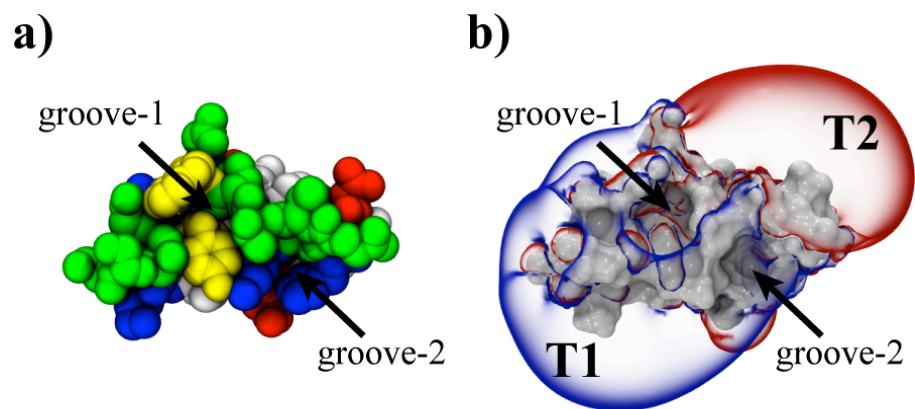

Figure S3.

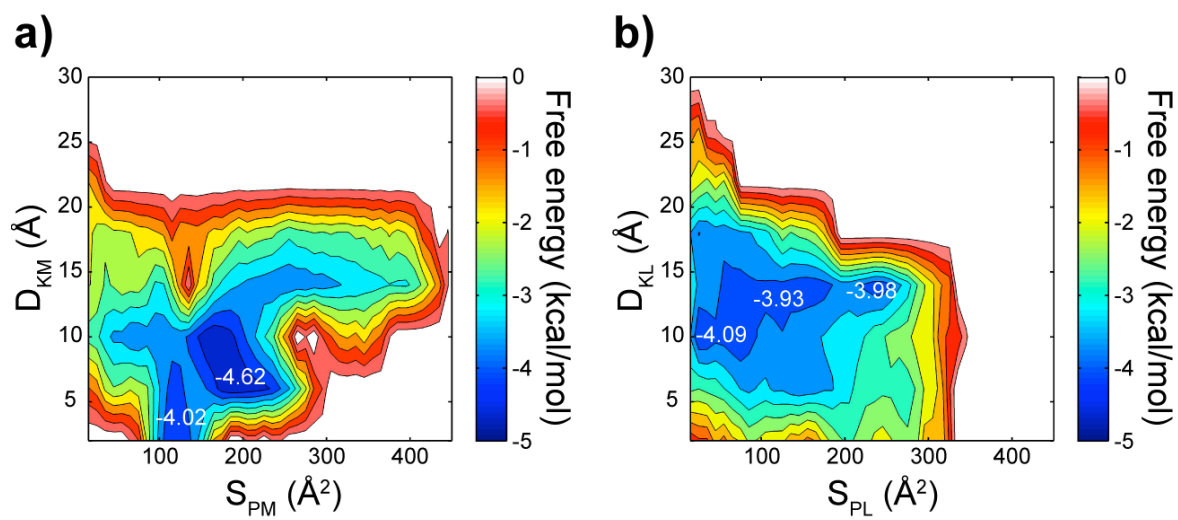

## References

- <sup>1</sup> Baker, N. A., Sept, D., Joseph, S., Holst, M. J. & McCammon, J. A. Electrostatics of nanosystems: application to microtubules and the ribosome. *Proc Natl Acad Sci USA* **98**, 10037-10041, (2001).
